# Supplementary material for: The synthesis and highly sensitive detection of water content in THF using a novel solvatochromic AIE polymer containing diketopyrrolopyrrole and triphenylamine
Source: Royal Society of Chemistry journal article supplement (doi:10.1039/c6nj00192k), 2016-01-01
Supplement: c6nj00192k1.pdf [file c6nj00192k1.pdf]

**Synthesis and highly sensitive detection of water content in THF  
using a novel solvatochromic AIE polymer containing  
diketopyrrolopyrrole and triphenylamine**

Lingyun Wang \*, Lingling Yang, Derong Cao

School of Chemistry and Chemical Engineering, South China University of  
Technology, Guangzhou, China, 510640

\*Corresponding author: Tel. +86 20 87110245; fax: +86 20 87110245. E-mail:

[lingyun@scut.edu.cn](mailto:lingyun@scut.edu.cn)

### Figure captions

**Fig. S1.**  $^1\text{H}$  NMR spectrum (a),  $^{13}\text{C}$  NMR spectrum (b) and Mass spectrum (c) of **Monomer 1**.

**Fig. S2**  $^1\text{H}$  NMR spectrum (a),  $^{13}\text{C}$  NMR spectrum (b) and Mass spectrum (c) of **Monomer 2**

**Fig. S3** UV-vis spectra of **N1** in DMF and DMF/H<sub>2</sub>O (9/1).

**Fig. S4** UV-vis spectra of **N1** in THF and THF/H<sub>2</sub>O.

**Fig.S5** UV-vis spectra of **P1** (20  $\mu\text{M}$ ) in the presence and absence of BSA in DMSO/PBS mixture (1:1, v/v).

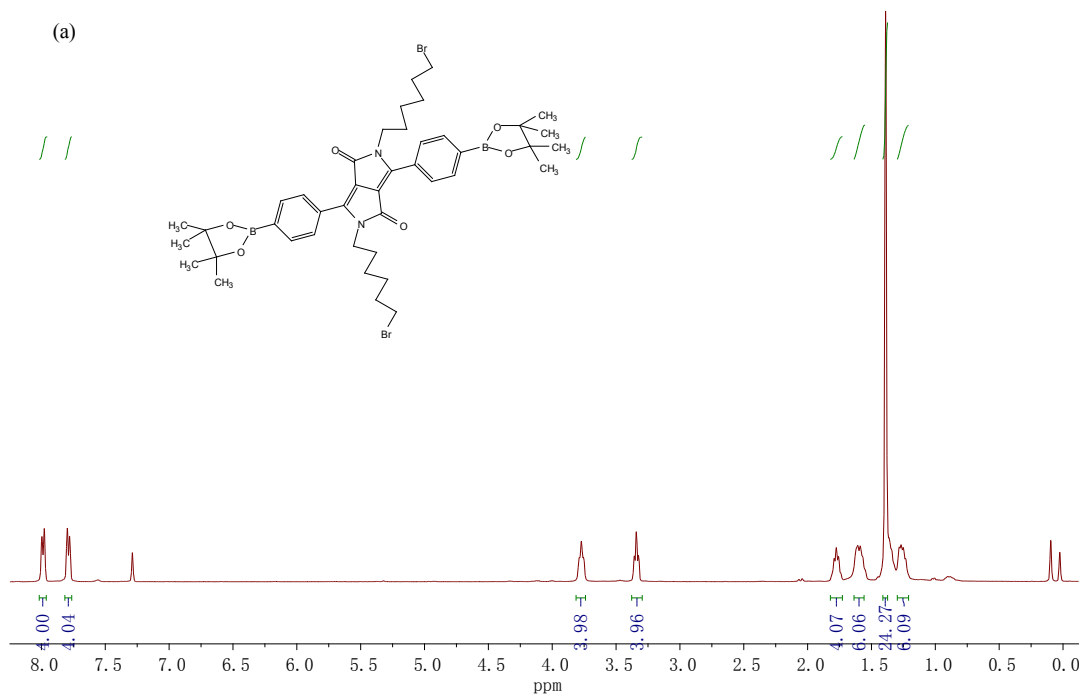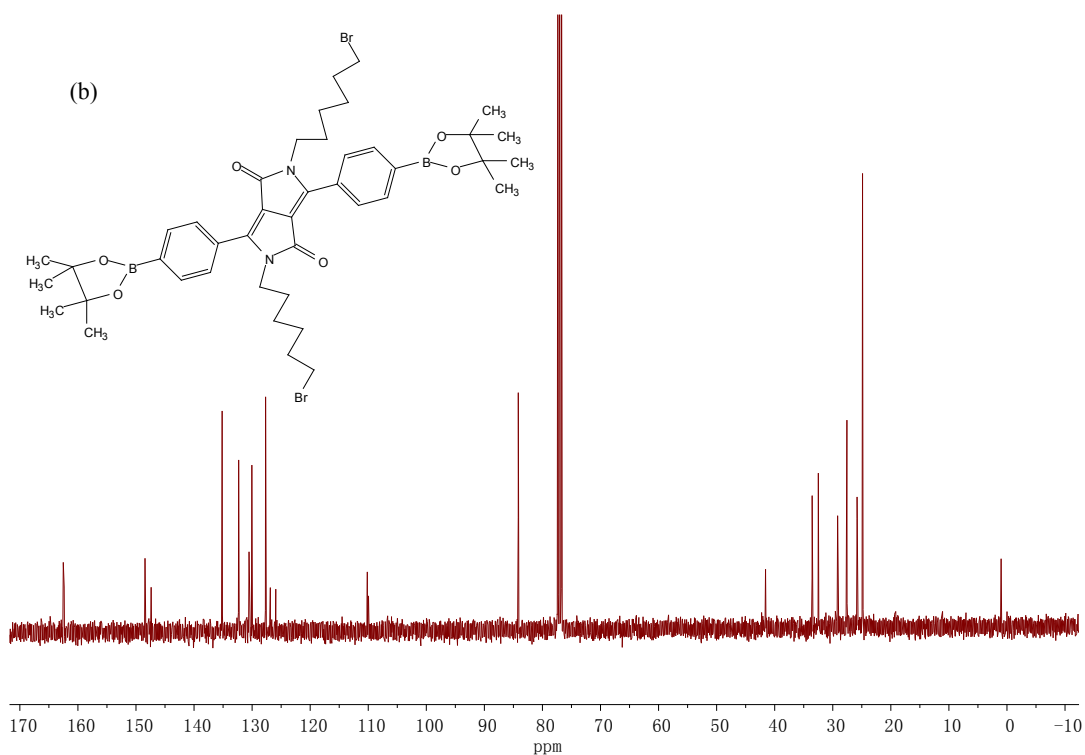

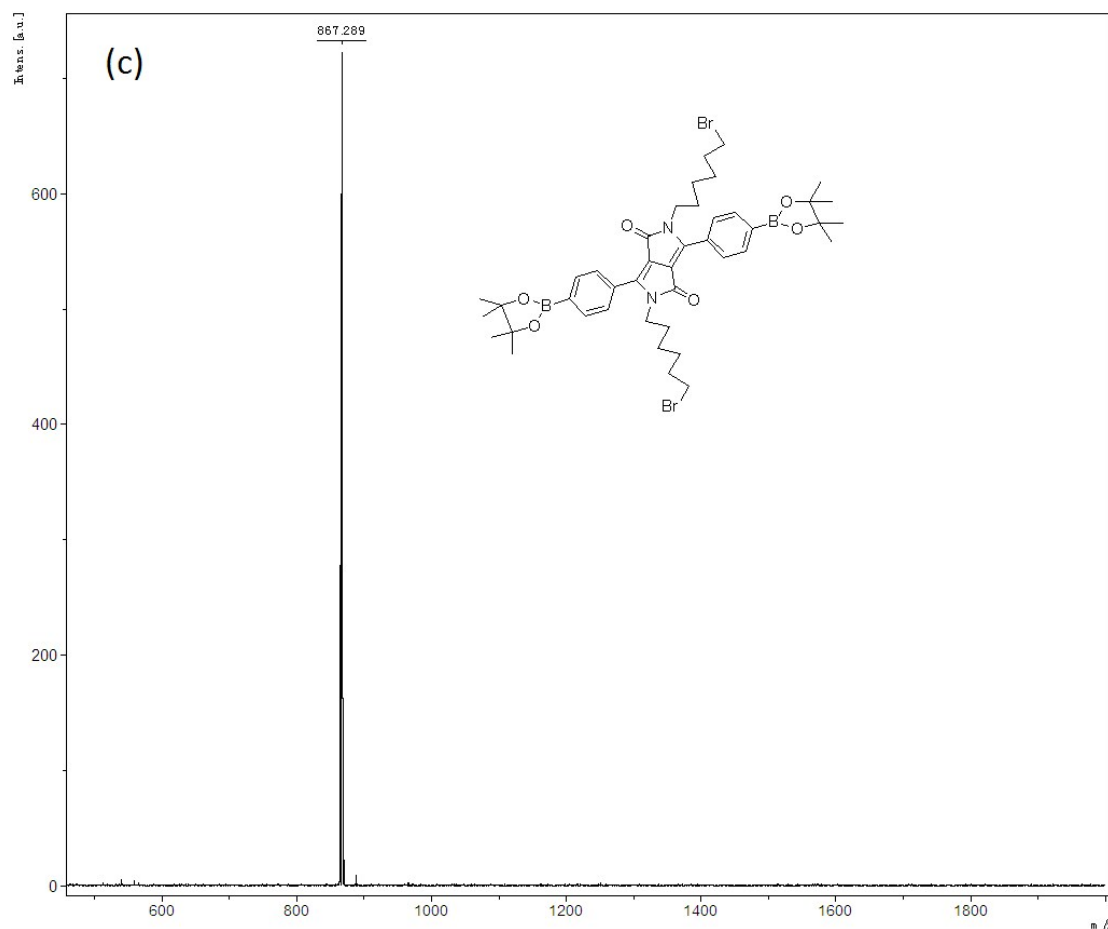

**Fig. S1.**  $^1\text{H}$  NMR spectrum (a),  $^{13}\text{C}$  NMR spectrum (b) and Mass spectrum (c) of **Monomer 1**.

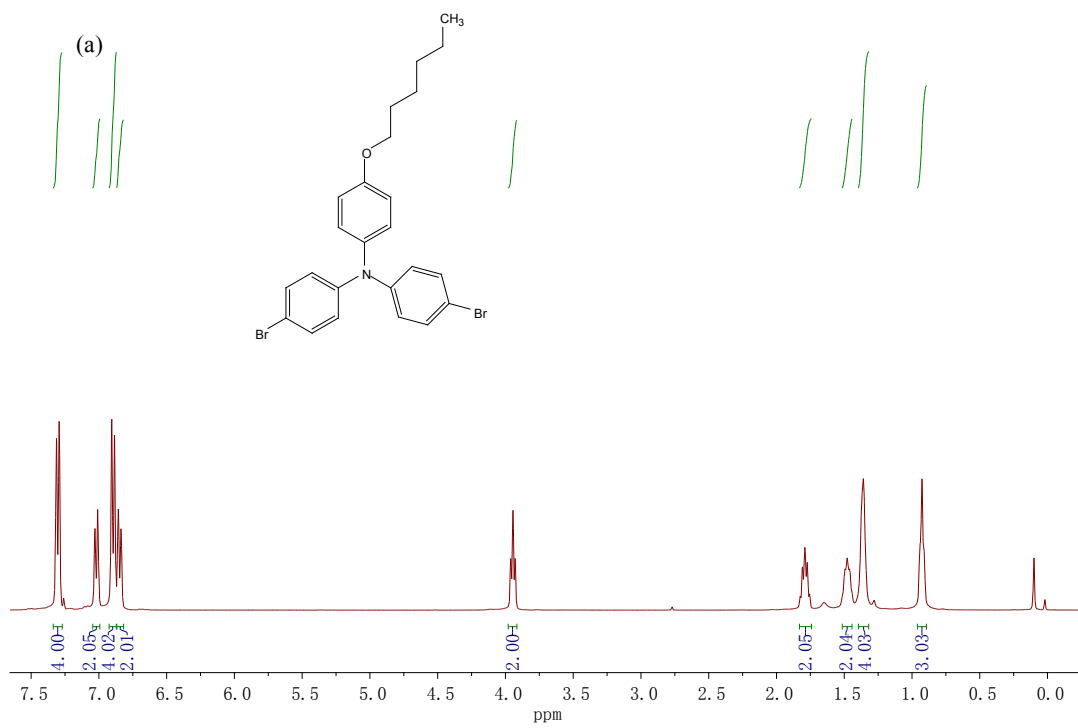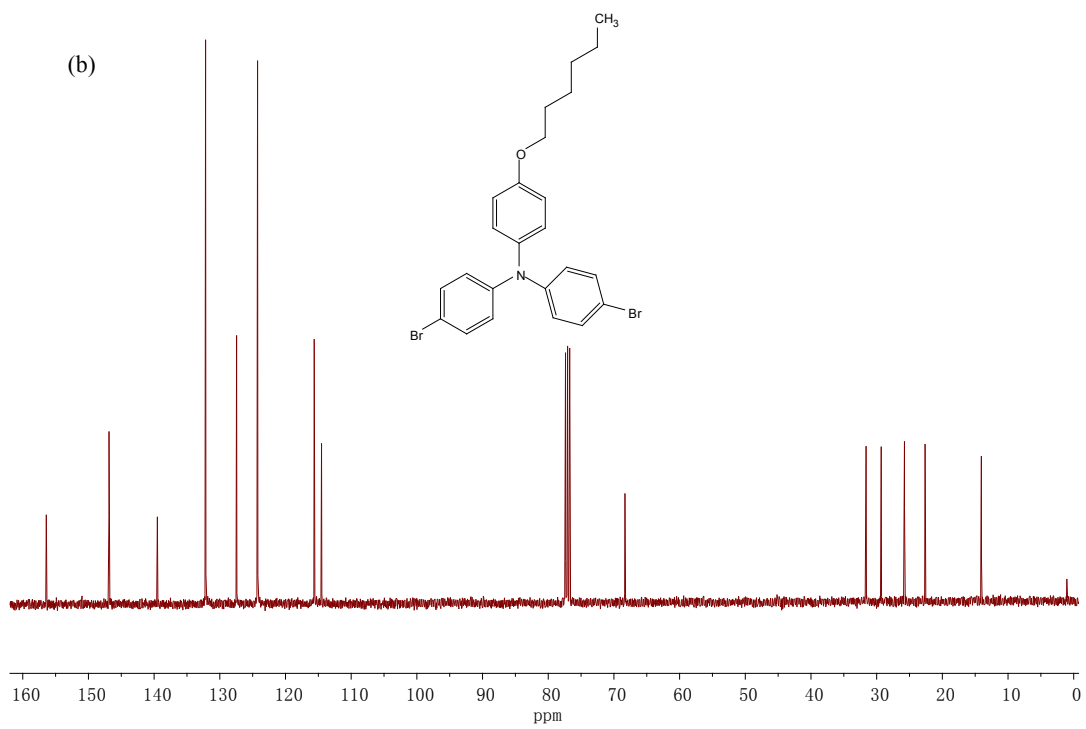

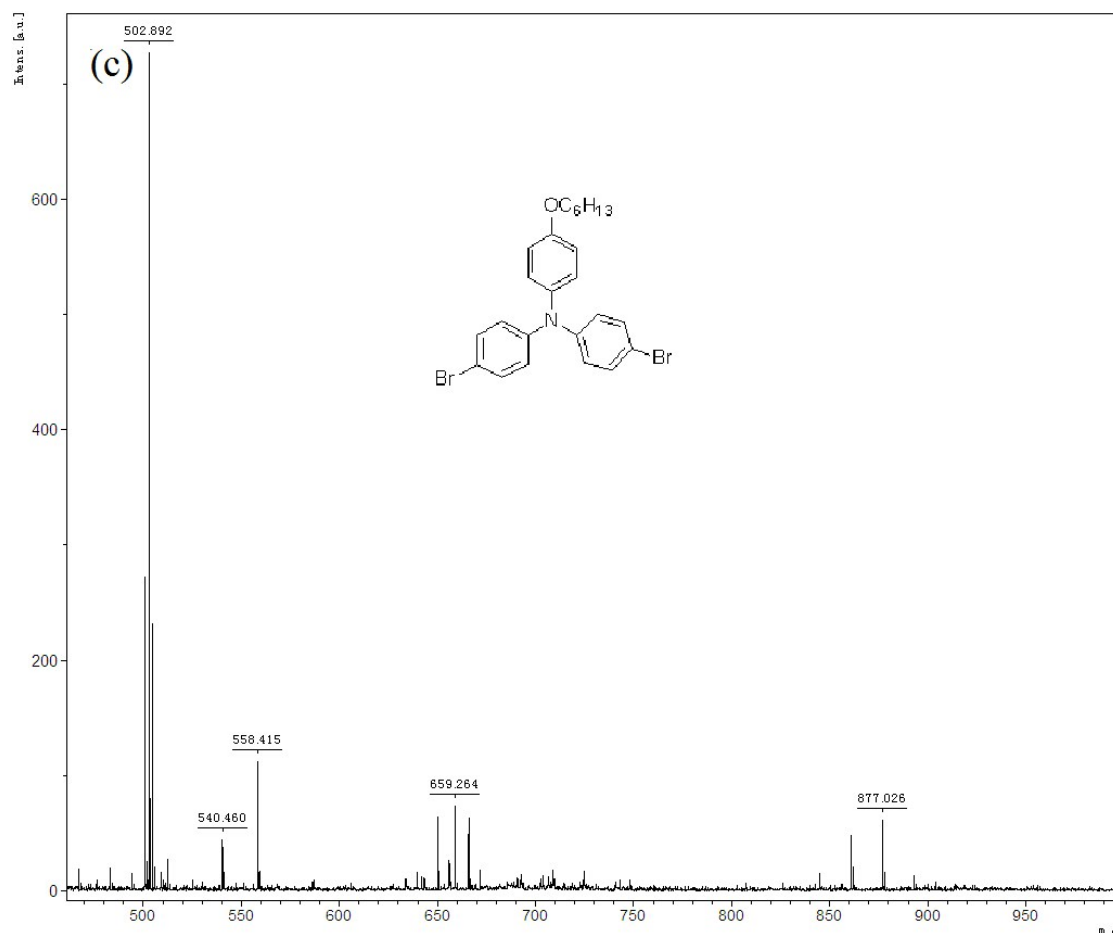

**Fig. S2**  $^1\text{H}$  NMR (a),  $^{13}\text{C}$  NMR (b) and Mass spectra (c) of **Monomer 2**

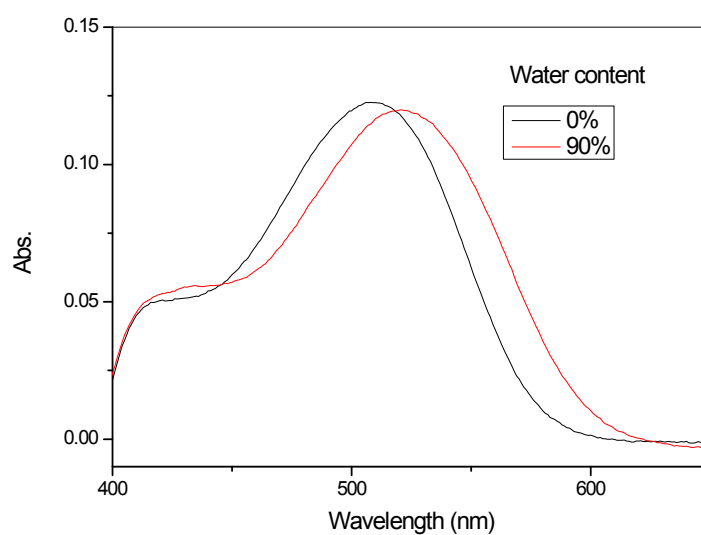

**Fig. S3** UV-vis spectra of **N1** in DMF and DMF/H<sub>2</sub>O (9/1).

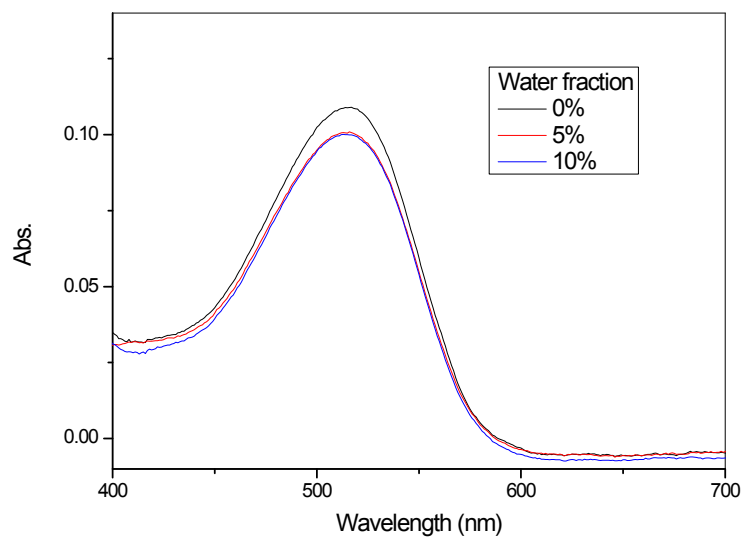

**Fig. S4** UV-vis spectra of **N1** in THF and THF/H<sub>2</sub>O

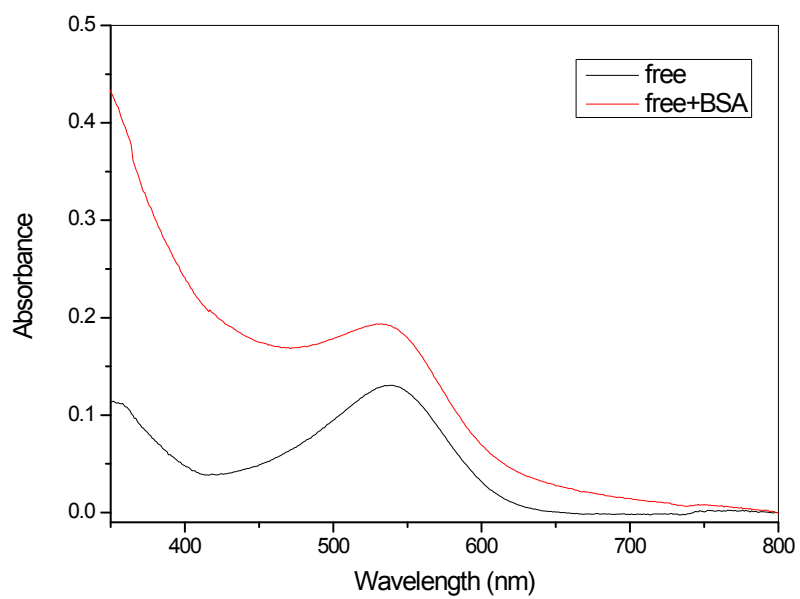

**Fig.S5** UV-vis spectra of **P1** (20 μM) in the presence and absence of BSA in DMSO/PBS mixture (1:1, v/v).
